# Supplementary material for: Protocol to develop a core outcome set in incisional hernia surgery: the HarMoNY Project
Source: PubMed Central journal article supplement — BMJ Open. 2022 Dec 6;12(12):e059463. doi: 10.1136/bmjopen-2021-059463 (PMC9730390; doi:10.1136/bmjopen-2021-059463), 2022-12-06
Supplement: bmjopen-2021-059463.draft_revisions.pdf [file bmjopen-2021-059463.draft_revisions.pdf]

# BMJ Open

BMJ Open is committed to open peer review. As part of this commitment we make the peer review history of every article we publish publicly available.

When an article is published we post the peer reviewers' comments and the authors' responses online. We also post the versions of the paper that were used during peer review. These are the versions that the peer review comments apply to.

The versions of the paper that follow are the versions that were submitted during the peer review process. They are not the versions of record or the final published versions. They should not be cited or distributed as the published version of this manuscript.

BMJ Open is an open access journal and the full, final, typeset and author-corrected version of record of the manuscript is available on our site with no access controls, subscription charges or pay-per-view fees (<http://bmjopen.bmj.com>).

If you have any questions on BMJ Open's open peer review process please email [info.bmjopen@bmj.com](mailto:info.bmjopen@bmj.com)

# BMJ Open

## A Protocol to Develop a Core Outcome Set in Incisional Hernia Surgery – The HarMoNY Project

|                               |                                                                                                                                                                                                                                                                                                                                                                                                                                                                                                                                                                                                                                                                                                                                                                                                                                                                                                                                                                                                  |
|-------------------------------|--------------------------------------------------------------------------------------------------------------------------------------------------------------------------------------------------------------------------------------------------------------------------------------------------------------------------------------------------------------------------------------------------------------------------------------------------------------------------------------------------------------------------------------------------------------------------------------------------------------------------------------------------------------------------------------------------------------------------------------------------------------------------------------------------------------------------------------------------------------------------------------------------------------------------------------------------------------------------------------------------|
| Journal:                      | <i>BMJ Open</i>                                                                                                                                                                                                                                                                                                                                                                                                                                                                                                                                                                                                                                                                                                                                                                                                                                                                                                                                                                                  |
| Manuscript ID                 | bmjopen-2021-059463                                                                                                                                                                                                                                                                                                                                                                                                                                                                                                                                                                                                                                                                                                                                                                                                                                                                                                                                                                              |
| Article Type:                 | Protocol                                                                                                                                                                                                                                                                                                                                                                                                                                                                                                                                                                                                                                                                                                                                                                                                                                                                                                                                                                                         |
| Date Submitted by the Author: | 20-Nov-2021                                                                                                                                                                                                                                                                                                                                                                                                                                                                                                                                                                                                                                                                                                                                                                                                                                                                                                                                                                                      |
| Complete List of Authors:     | Harji, Deena; Manchester University NHS Foundation Trust<br>Thomas, Christophe ; Northern Surgical Trainees Research Association ,<br>Antoniou, Stavros; Mediterranean Hospital of Cyprus,<br>Chandraratan , Harsha ; Notra Dame University , General Surgery;<br>Obesity Surgery WA, 162 Cambridge St<br>Griffiths , Ben; Manchester University NHS Foundation Trust<br>Heniford, Todd; Carolinas Medical Center<br>Horgan , Liam ; Northumbria Healthcare NHS Foundation Trust<br>Koeckerling, Ferdinand; Vivantes<br>Lopez-Cano, Manuel; Univ Autonoma Barcelona<br>Massey , Lisa ; Royal Devon & Exeter NHS Foundation Trust, Colorectal<br>Surgery<br>Miserez, Marc ; University Hospital Gasthuisberg<br>Montgomery, Agneta; Skanes universitetssjukhus Malmo, surgery<br>Muysoms , Filip ; Maria Middelaes<br>Poulose, Benjamin; The Ohio State University Wexner Medical Center<br>Reinpold , Wolfgang ; Gross Sand Hospital<br>Smart , Neil ; Royal Devon & Exeter NHS Foundation Trust |
| Keywords:                     | QUALITATIVE RESEARCH, SURGERY, STATISTICS & RESEARCH METHODS                                                                                                                                                                                                                                                                                                                                                                                                                                                                                                                                                                                                                                                                                                                                                                                                                                                                                                                                     |
|                               |                                                                                                                                                                                                                                                                                                                                                                                                                                                                                                                                                                                                                                                                                                                                                                                                                                                                                                                                                                                                  |

SCHOLARONE™  
Manuscripts

1  
2  
3 A Protocol to Develop a Core Outcome Set in Incisional Hernia Surgery – The  
4  
5 HarMoNY Project  
6  
7  
8  
9

10 ***NoSTRA HarMoNY***

11 (Northern Surgical Trainees Research Association Hernia & Abdominal Reconstruction - Measuring  
12 Outcomes, Nociception & quality of life) collaborative research group.  
13  
14  
15

16 All authors including the corresponding author will come under the collaborative authorship of NoSTRA  
17 HarMoNY.  
18  
19

20  
21  
22 **Corresponding Author**  
23

24 Miss Deena Harji

25  
26 Department of Colorectal Surgery, Manchester University NHS Foundation Trust, Wythenshawe

27 Hospital, Southmoor Rd, Wythenshawe, Manchester M23 9LT

28  
29 [Deena\\_harji@hotmail.com](mailto:Deena_harji@hotmail.com)  
30  
31

32  
33 Christophe Thomas

34  
35 Northern Surgical Trainees Research Association (NoSTRA)

36  
37 Northern Deanery, Waterfront 4, Goldcrest Way, Newburn Riverside, Newcastle Upon Tyne, NE15

38  
39 8NY

40  
41 [c.l.g.thomas@gmail.com](mailto:c.l.g.thomas@gmail.com)  
42  
43

44  
45 Stavros A. Antoniou

46  
47 Department of Surgery, Royal Devon & Exeter NHS Foundation Trust, Exeter, UK

48  
49 [stavros.antoniou@hotmail.com](mailto:stavros.antoniou@hotmail.com)  
50  
51

52  
53 Harsha Chandraratan

54  
55 Notra Dame University , General Surgery, 27/100 Murdoch Drive, Murdoch , Murdoch, WA, Australia

56  
57 [drchandra747@gmail.com](mailto:drchandra747@gmail.com)  
58  
59  
60

1  
2  
3 Ben Griffiths

4  
5 Department of Colorectal Surgery, Manchester University NHS Foundation Trust, Manchester Royal  
6  
7 Infirmary, Oxford Road, Manchester, M13 9WL

8  
9 [Bengriffiths73@icloud.com](mailto:Bengriffiths73@icloud.com)  
10  
11  
12  
13

14  
15 B Todd Henniford

16 Division of Gastrointestinal and Minimally Invasive Surgery Carolinas Medical Center, Charlotte, NC

17  
18 [todd.heniford@gmail.com](mailto:todd.heniford@gmail.com)  
19  
20  
21

22  
23 Liam Horgan

24 Upper Gastrointestinal Surgical Department, Northumbria Healthcare NHSFT, North Shields, Tyne  
25  
26 and Wear, UK

27  
28 [liam@horgans.info](mailto:liam@horgans.info)  
29  
30  
31

32  
33 Ferdinand Köckerling M.D

34 Department of Surgery and Center for Minimally Invasive Surgery, Academic Teaching Hospital of  
35  
36 Charité Medical School, Vivantes Hospital, Neue Bergstraße 6, D-13585 Berlin, Germany

37  
38 [ferdinand.koeckerling@vivantes.de](mailto:ferdinand.koeckerling@vivantes.de)  
39  
40  
41

42  
43 Manuel López-Cano

44 Abdominal Wall Surgery Unit, Hospital Universitario Vall d'Hebron, Universidad Autónoma de  
45  
46 Barcelona, Barcelona, Spain

47  
48 [mlpezcano@gmail.com](mailto:mlpezcano@gmail.com)  
49  
50  
51

52  
53 Lisa Massey

54 Department of Surgery, Royal Devon & Exeter NHS Foundation Trust, Exeter, UK

55  
56 [lisahmassey@gmail.com](mailto:lisahmassey@gmail.com)  
57  
58

59  
60 Marc Miserez

1  
2  
3 Dept of Abdominal Surgery, University Hospital Gasthuisberg, KU Leuven, 3000 Leuven, Belgium

4  
5 [marc.miserez@uzleuven.be](mailto:marc.miserez@uzleuven.be)  
6  
7

8  
9 Agneta Montgomery

10  
11 Department of Clinical Sciences Malmö, Lund University, Malmö Sweden

12  
13 [Agneta.Montgomery@skane.se](mailto:Agneta.Montgomery@skane.se)  
14  
15

16  
17 Filip Muysoms

18  
19 Department of Surgery, Maria Middelaes, Ghent, Belgium

20  
21 [filip.muysoms@gmail.com](mailto:filip.muysoms@gmail.com)  
22  
23

24  
25 Benjamin K. Poulouse

26  
27 Division of General and Gastrointestinal Surgery, The Ohio State University Wexner Medical Center,

28  
29 N729 Doan Hall, 410 West 10<sup>th</sup> Avenue, Columbus, OH 43210

30  
31 [benjamin.poulouse@osumc.edu](mailto:benjamin.poulouse@osumc.edu)  
32  
33

34  
35 Wolfgang Reinpold

36  
37 Dept. of Surgery and Reference Hernia Center, Gross Sand Hospital Hamburg, Gross Sand 3, D-21107

38  
39 Hamburg, Germany

40  
41 [wreinpold@gmx.net](mailto:wreinpold@gmx.net)  
42  
43

44  
45 Neil Smart

46  
47 Department of Surgery, Royal Devon & Exeter NHS Foundation Trust, Exeter, UK

48  
49 [drneilsmart@hotmail.com](mailto:drneilsmart@hotmail.com)  
50

51  
52 Word Count: 2609

53  
54 Author Contribution

55  
56  
57 Deena Harji - Idea generation, data collection and analysis, write up

58  
59 Stavros A. Antoniou - Idea generation, Review of manuscript  
60

1  
2  
3 Harsha Chandraratan - Review of manuscript  
4  
5 Ben Griffiths - Idea generation, data collection and analysis, manuscript review  
6  
7 Todd Henniford - Review of manuscript  
8  
9 Liam Horgan - Review of manuscript  
10  
11 Ferdinand Köckerling - Review of manuscript  
12  
13 Manuel López-Cano - Review of manuscript  
14  
15 Lisa Massey - Review of manuscript  
16  
17 Marc Miserez - Review of manuscript  
18  
19 Agneta Montgomery - Idea generation, Review of manuscript  
20  
21 Filip Muysoms - Review of manuscript  
22  
23 Benjamin K. Poulouse - Review of manuscript  
24  
25 Wolfgang Reinpold - Review of manuscript  
26  
27 Neil Smart - Idea generation, data analysis, manuscript review  
28  
29 Christophe Thomas - Idea generation, data collection and analysis, write up  
30

## 31 Abstract

## 32 Introduction

33  
34  
35  
36 Incisional hernia has an incidence of up to 20% following laparotomy and is associated with significant  
37 morbidity and impairment of quality of life. A variety of surgical strategies including techniques and  
38 mesh types are available to manage patients with incisional hernia. Previous works have reported  
39 significant heterogeneity in outcome reporting for abdominal wall herniae, including ventral and inguinal  
40 hernia. This is coupled with under-reporting of important clinical and patient-reported outcomes. The  
41 lack of standardisation in outcome reporting contributes to reporting bias, hinders evidence synthesis and  
42 adequate data comparison between studies. This project aims to develop a core outcome set (COS) of  
43 clinically important, patient-oriented outcomes to be used to guide reporting of future research in  
44 incisional hernia.  
45  
46  
47  
48  
49  
50  
51  
52  
53  
54

## 55 Methods

56  
57  
58 This project has been designed as an international, multi-centre, mixed-methods project. Phase I will be  
59 a systematic review of current literature to examine the current clinical and patient-reported outcomes  
60

1  
2  
3 for incisional hernia and abdominal wall reconstruction. Phase II will identify the outcomes of  
4 importance to all key stakeholders through in depth qualitative interviews. Phase III will achieve  
5 consensus on outcomes of most importance and for inclusion into a COS through a Delphi process. Phase  
6  
7  
8  
9 IV will achieve consensus on the outcomes that should be included in a final COS.

## 10 11 12 13 Ethics and Dissemination

14  
15 Ethical approval for this study has been granted by the Health Research Authority. The results of this  
16  
17 study will be disseminated through publication in peer-reviewed journals and presentations.

18  
19 The adoption of this COS into clinical and academic practice will be endorsed by the American, British  
20  
21 and European Hernia Societies. Its utilisation in future clinical research will enable appropriate data  
22  
23 synthesis and comparison and will enable better clinical interpretation and application of the current  
24  
25 evidence base. This study has been registered with the Core Outcome Measures in Effectiveness Trials  
26  
27 (COMET) initiative.

28  
29  
30  
31 Trial Registration: PROSPERO registration CRD42018090084.

## 32 33 34 35 Strengths and Limitations

- 36 • This project will ensure the development of an international, clinically relevant, patient-oriented  
37 core outcome set to be used to guide outcome reporting in future clinical research.
- 38 • A robust systematic review will identify current outcomes in randomised and non-randomised  
39 studies reporting outcomes in incisional hernia.
- 40 • In-depth qualitative interviews with key stakeholders including patients, nurses, radiologists,  
41 physiotherapists, members of international hernia societies and industry partners will identify  
42 outcomes of importance to all these groups.
- 43 • This project will determine which outcomes to measure, however, further work will be  
44 necessary to agree and recommend a definition or measurement instrument for each of the  
45 outcomes in the COS.
- 46  
47  
48  
49  
50  
51  
52  
53  
54  
55  
56  
57

## 58 59 60 Background

1  
2  
3 Incisional hernia following laparotomy has an incidence of up to 20% and is associated with significant  
4 morbidity and impairment of quality of life [1]. The management of incisional hernia has evolved over  
5 recent years, with a variety of techniques, meshes and operative strategies available to manage this  
6 challenging cohort of patients. Given the range of options available there is significant complexity  
7 involved in the management of patients with incisional hernia. Alongside this there is considerable  
8 variation in management and outcome reporting. Despite an exponential increase in the number of peer-  
9 reviewed publications on the management of incisional hernia over the last decade [2], the  
10 methodological quality of the majority of these studies is poor, with the majority of studies reporting  
11 outcomes on incisional hernia being of Level 4 quality according to the Oxford Centre for Evidence  
12 Based Medicine [3]. A recent systematic review reported over 75% of randomised controlled trials and  
13 meta-analyses reporting outcomes on ventral hernias were methodologically flawed, with variable  
14 adherence to standardised reporting frameworks such as Consolidated Standards of Reporting  
15 Trials (CONSORT) checklist or Preferred Reporting Items for Systematic Reviews and Meta-Analyses  
16 (PRISMA) Checklist PRISMA [3].

17  
18  
19  
20  
21  
22  
23  
24  
25  
26  
27  
28  
29  
30  
31  
32 There is little known about standardised outcome reporting in patients with incisional hernia. Previous  
33 work examining outcome reporting for inguinal hernia identified significant variation in outcomes  
34 employed to report clinical outcomes in this group. Significant heterogeneity in outcome definitions and  
35 assessment instruments exist in inguinal hernia outcome reporting, alongside under-reporting of a  
36 number of important clinical and patient-reported outcomes [4]. More recently, work examining outcome  
37 reporting in randomised controlled trials of ventral hernia revealed marked heterogeneity in outcome  
38 reporting of clinical endpoints related to hernia recurrence [5]. Subsequently, it may be hypothesised that  
39 similar variation and under-reporting of relevant outcomes exists within the current literature for  
40 incisional hernia repair.

41  
42  
43  
44  
45  
46  
47  
48  
49  
50  
51 Core outcome sets (COS) have been developed to overcome heterogeneity in outcome reporting, reduce  
52 reporting bias and enable adequate evidence synthesis, comparison of data between studies and  
53 meaningful clinical interpretation and application of current evidence [6]. COS are an agreed set of  
54 outcomes, which should be measured and reported, as a minimum in all studies and trials for a specific  
55 clinical area. This work was initiated and developed by the COMET (Core Outcome Measures in  
56  
57  
58  
59  
60



1  
2  
3 Effectiveness Trials) initiative, which aims to facilitate and guide the development of a number of COS  
4 [7]. Currently, there is no COS for incisional hernia. However, there are guidelines available to guide  
5 reporting outcomes with regards to mesh properties [8] and clinical outcomes [9] associated with  
6 abdominal wall repair. Although, these guidelines are useful in trying to standardise reporting outcomes,  
7 they do not reflect the opinion of all stakeholders, in particular patients, when considering which  
8 outcomes are of the most importance when reporting outcomes related to incisional hernia repair. To  
9 improve the quality of the current evidence base and to improve outcome reporting a COS in incisional  
10 hernia is highly desirable.  
11  
12  
13  
14  
15  
16  
17  
18  
19

## 20 Aims

21  
22 The aim of this project is to develop a COS of clinically important, patient-oriented outcomes to be used  
23 to guide reporting of future research in incisional hernia.  
24  
25  
26  
27

## 28 Methods

29  
30 An international, mixed-methods study will be conducted in accordance with Core Outcome Measures  
31 in Effectiveness Trials (COMET) guidelines to develop a COS for use in incisional hernia. Phase I will  
32 examine the current clinical and patient-reported outcomes for incisional hernia and abdominal wall  
33 reconstruction within the literature. Phase II will identify the outcomes of importance to all key  
34 stakeholders through in depth qualitative interviews. Phase III will achieve consensus on outcomes of  
35 most importance and for inclusion into a COS through a Delphi process. Phase IV will achieve consensus  
36 on the outcomes that should be included in a final COS.  
37  
38  
39  
40  
41  
42  
43  
44  
45

### 46 Phase I: Systematic review of clinical and patient-reported outcomes

47  
48 A number of detailed systematic reviews of currently reported clinical and patient reported outcomes in  
49 incisional hernia and complex abdominal wall reconstruction will be conducted. The full protocol  
50 including eligibility criteria and search strategy is available online via the PROSPERO database  
51 (CRD42018090084).  
52  
53  
54  
55  
56  
57  
58  
59

### 60 Phase II: Stakeholder Qualitative Interviews

1  
2  
3 To ensure all key stakeholders are appropriately represented and all outcomes are captured within the  
4 COS we will conduct in-depth qualitative interviews with patients and other stakeholders that are not  
5 adequately represented within the current literature i.e. nurses, radiologists, physiotherapists. We will  
6  
7 also interview key members of the international hernia societies including the American Hernia Society,  
8  
9 British Hernia Society and the European Hernia Society and industry partners in a bid to gauge a wider  
10  
11 perspective.  
12  
13  
14  
15

## 16 Recruitment

### 17 Healthcare professionals

18 All members of the American Hernia Society, the British Hernia Society and the European Hernia  
19  
20 Society will be contacted and invited to participate.  
21  
22  
23  
24  
25

### 26 Industry Partners

27 Industry partners will be identified through key hernia organisations including the American Hernia  
28  
29 Society, the British Hernia Society and the European Hernia Society. Industry stakeholders will be  
30  
31 contacted and invited to participate.  
32  
33  
34  
35

### 36 Patients

37 Members of the American Hernia Society, British Hernia Society and the European Hernia Society will  
38  
39 be asked to identify potential patient participants from clinic lists, theatre lists and patient records.  
40  
41 Recruitment letters will be sent to the identified patients, either in person during routine follow up visits  
42  
43 or by post. The recruitment letter will give a full explanation of the qualitative interviews, instructions  
44  
45 to participate and the contact details of the research team.  
46  
47  
48  
49

## 50 Methodology

51 In-depth face-to-face or telephone cognitive interviews will be undertaken with eligible patients and  
52  
53 stakeholders. Interviews will explore patients' perceptions and experiences regarding living with an  
54  
55 incisional hernia and will identify the thoughts and opinions of stakeholders who are not adequately  
56  
57 represented within the current literature. A standardised, semi-structured interview guide will inform the  
58  
59 cognitive interviews. All interviews will be recorded. Open-ended questions will be used at the start of  
60

the cognitive interview followed by close-ended questions to further explore any relevant themes. To ensure appropriate representation of all stakeholders, we will conduct interviews with patients and other key stakeholders from all participating countries. We will aim to conduct between 5-10 interviews per country.

#### Patient Eligibility Criteria

##### Inclusion criteria:

- Aged >18 years old.
- With an existing incisional hernia **or**
- A surgically treated incisional hernia in the last 12 months **and**
- Able to provide written informed consent

##### Exclusion criteria:

- An existing other ventral hernia i.e. epigastric, umbilical, paraumbilical, inguinal, port-site hernia **or**
- A surgically treated ventral hernia i.e. epigastric, umbilical, paraumbilical, inguinal, port-site hernia **or**

To ensure our COS is representative of all stakeholders, with particular reference to patients with incisional hernia a purposive sampling strategy has been designed to aid recruitment (Table 1). Our sampling strategy will target a number of key factors to reflect the range and diversity of the target population. There is no minimal sample size for cognitive interviews.

Table 1: Purposive Sampling Strategy

| Patient Factors | Number of Patients |
|-----------------|--------------------|
| Age             |                    |
| 18-30           | 4                  |

|                                    |                        |
|------------------------------------|------------------------|
| 31 – 60                            | 4                      |
| >60                                | 4                      |
| <b>Gender</b>                      |                        |
| Male                               | 8-10                   |
| Female                             | 8-10                   |
| <b>Presentation</b>                |                        |
| Elective                           | 6-8                    |
| Emergency                          | 6-8                    |
| <b>Repair</b>                      |                        |
| Primary                            | 6-8                    |
| Mesh                               | 6-8                    |
| <b>No of repairs</b>               |                        |
| 1 <sup>st</sup> repair             | 4                      |
| Recurrent incisional hernia repair | 4                      |
| <b>Hernia size</b>                 |                        |
| <10cm in width                     | 8 – 10                 |
| >10cm in width                     | 8 – 10                 |
| <b>Use of adjuncts</b>             |                        |
| Yes                                | 4                      |
| No                                 | 4                      |
| <b>Stakeholder Factors</b>         | Number of Participants |
| <b>Speciality</b>                  |                        |
| General Surgery                    | 4-6                    |
| Plastic Surgery                    | 4-6                    |
| Radiology                          | 4-6                    |
| Specialist nurses/physiotherapists | 4-6                    |
| Industry partner                   | 4-6                    |
| <b>Country</b>                     |                        |
| UK                                 | 4                      |
|                                    | 4                      |

|           |   |
|-----------|---|
| Europe    | 4 |
| USA       | 4 |
| Australia |   |

## Data Analysis

All interviews will be audio recorded and transcribed verbatim and transcripts will be imported into NVivo. All transcripts will be anonymised. Interviews will be coded using the principles of thematic content analysis [10]. Relevant outcomes will be identified and appropriately coded from the transcripts using a provisional coding framework based on the outcomes extracted from the systematic review. Coded outcomes that are sufficiently similar will be grouped into similar categories and then themes. Analysis will be an iterative process, with data being analysed after rounds of three consecutive interviews. Data analysis will be continued up until the point of data saturation. This is the point on the data analysis process where no further information is elicited.

## Phase III: Delphi Study

### Consolidation of Outcomes

The outcomes identified in Phase I and II will be combined, developed into a long-list of items and categorised into broad domains using the principles of thematic content analysis. Appropriate questions will be mapped to these domains and will form the basis of the Delphi study. Questions will have a lay translation available. We will pilot the Delphi study with our steering committee to ensure it is accessible, comprehensible and content valid.

### Forward-Backward Translation

Given the international nature of this study, we will translate the Delphi study using forward-backward translation to ensure accessibility of the study by all international participants. The aim of translation is to achieve different language versions of the original Delphi questionnaire. The linguistic and translation process should ensure that the translated version of the Delphi are conceptual, semantic and pragmatic equivalents of the original questionnaire, whilst ensuring it is culturally appropriate, relevant and

1  
2  
3 meaningful to the target countries. The original Delphi questionnaire (English) will be used as the  
4 standard from which all other translations are made.  
5  
6  
7  
8

9 Forward translation will be undertaken by two healthcare professionals with an understanding of  
10 incisional hernia. The translators will be bilingual with their primary language being that of the target  
11 country. They will perform a detailed review of the Delphi questionnaire and translate the questionnaire  
12 appropriately. Two independent translations will be prepared; these will be reviewed and compared to  
13 achieve a consensus version. Any discrepancies between the translated version and the original Delphi  
14 questionnaire will be discussed with the steering committee.  
15  
16  
17  
18  
19

20  
21  
22 The final translated version will be translated back into English (backward translation). This will be done  
23 by a native English speaker who is also proficient in the target language. The original Delphi  
24 questionnaire will be compared to the backward translation version and reviewed to ensure consistency.  
25  
26 The aim is to ensure linguistic and conceptual equivalence between the original and translated versions  
27 of the Delphi. Any discrepancies will be discussed and resolved with the steering committee and the  
28 bilingual translators who undertook the forward translation. If equivalent versions have not been created  
29 further translational work may be required. This may include additional forward translations and/or the  
30 addition of further items/questions and will be repeated as many times as necessary to achieve a  
31 satisfactory translated version.  
32  
33  
34  
35  
36  
37  
38  
39  
40

## 41 Recruitment

42  
43  
44  
45 Method of recruitment will be the same as Phase II. Healthcare professionals, patients and industry  
46 stakeholders will be invited to participate through online web and social media platforms of the  
47 participating hernia societies (American, British and European) and through the Northern Surgical  
48 Trainees Research Association. Snowball sampling will be allowed to increase the sample size and reach  
49 of the study.  
50  
51  
52  
53  
54

## 55 Sample Size

1  
2  
3 There are no pre-requisite criteria for sample size for participation in Delphi studies. We hope by  
4 engagement with the American, British and European hernia societies we will capture the majority of  
5 individuals interested in incisional hernia.  
6  
7  
8  
9

## 10 Consent

11  
12 No explicit consent will be obtained for participation in the Delphi study. Consent will be implied  
13 through the process of participation. The registration page of the website hosting the Delphi study will  
14 outline that registration to participate in the Delphi process through submission of name and email  
15 address will indicate agreement to participate.  
16  
17  
18  
19  
20  
21  
22

## 23 Delphi Process

24  
25 The aim of the Delphi study is to achieve consensus amongst all key stakeholders including patients,  
26 surgeons, radiologists and specialist nurses on the importance of different outcomes in sequential  
27 questionnaires. The Delphi questionnaires will be developed using the DelphiManager software  
28 developed by the COMET initiative. Relevant demographics will be collected for each stakeholder  
29 group.  
30  
31  
32  
33  
34  
35

36 Two sequential rounds of Delphi voting will be held with a feedback round in between. The first Delphi  
37 round will enable participants to suggest outcomes that may not have been included or overlooked. The  
38 spread of scores for each question item should be reduced in between rounds as consensus is reached.  
39 Following the first Delphi round participants will be provided with feedback. Participants will have  
40 access to their individual scores from the first round and scores from key stakeholder group.  
41  
42  
43  
44  
45  
46  
47

48 All included outcomes will be scored on a 9 point Likert scale, with 1 being 'not essential' to 9 being  
49 'absolutely essential' for inclusion into a COS. The 9 point Likert scale will be grouped into three  
50 categories; 1-3 (limited importance), 4-6 (important but not critical), 7-9 (of critical importance).  
51  
52  
53  
54  
55

56 Consensus will be defined as the following:

57 For inclusion: more than 75% of respondents within a stakeholder group rate the outcome as critically  
58 important and less than 15% of respondents rate the outcome as of limited importance.  
59  
60

1  
2  
3 For exclusion: more than 75% of respondents within a stakeholder group the outcome as of limited  
4 importance and less than 15% of respondents rate the outcome as of critical importance.  
5

6  
7 No consensus  
8  
9

## 10 11 Phase IV: Consensus Meeting

12  
13 A consensus meeting of all key stakeholders will be held in conjunction with a European Hernia Society  
14 meeting to discuss the results from the Delphi study. All participants registering to complete the Delphi  
15 study will be invited to participate in the consensus meeting. The aim of this consensus meeting is to  
16 agree on the final COS for incisional hernia. All outcomes will be discussed; a proposal will be made to  
17 include all outcomes in the final COS that have been categorised as 'for inclusion' by all stakeholders  
18 and to exclude all outcomes that have been categorised as 'for exclusion' by all stakeholders. Participants  
19 will vote electronically to accept or reject these proposals. All other outcomes categories as 'for  
20 inclusion', 'for exclusion' or 'no consensus' by one or two stakeholders will be discussed and further  
21 rounds of voting will be used to agree the final COS. If no consensus is achieved a further consensus  
22 meeting will be held.  
23  
24  
25  
26  
27  
28  
29  
30  
31  
32

## 33 34 Patient and Public Involvement

35  
36  
37 The HarMoNY project has been discussed with patients at national hernia meetings and has been well  
38 received. A dedicated, international patient and public (PPI) steering group will be appointed to inform  
39 the processes of Phases II-IV of this project. Patients will be approached by key members of the project  
40 team to participate in this steering group. This PPI steering group will help inform recruitment processes,  
41 help design and evaluate all patient information sheets to ensure all information is applicable and  
42 understandable and advise on the content and format of dissemination of the final COS.  
43  
44  
45  
46  
47  
48  
49  
50

## 51 52 Ethics

53  
54 Ethical approval has been obtained from the Health Research Authority and Health and Care Research  
55 Wales (REC 21/WA/0278). Appropriate ethical approval will be sought from all participating countries  
56 in accordance with local and national guidelines. This study will be conducted in keeping with the  
57 Declaration of Helsinki.  
58  
59  
60



## Discussion

Defining important outcomes and standardising their reporting has been recognised to be of key importance in clinical research, which has subsequently led to the development of a number of COS. There has been a steady rise in the adoption and utilisation of COS [11], with a number of key stakeholders, including commissioners and funding bodies recognising the importance and benefits of COS for improving reporting outcomes [12]. Incisional hernia repair can be complex with significant variation in clinical management due to the great diversity of available surgical techniques [13, 14]. To ensure clinical heterogeneity is not reflected in outcome reporting the development of COS in this cohort of patients is essential. Ensuring consistent outcome reporting will reduce reporting bias, improve data synthesis and comparison, and will enable better clinical interpretation and application of the current evidence base. It is hoped through the development of a COS for incisional hernia, internationally agreed by patients, clinicians and key stakeholders, including the American, British and European Hernia Society, a minimum number of key outcomes will be reported in future clinical studies. This will help strengthen the current evidence base informing incisional hernia repair through standardised reporting.

### **Contributorship:**

Study design: DH/CT/NS/BG/LH

Protocol writing: DH/CT/NS/BG

Methodological input: AM/FM/MM/TH/BP/AA/FK/WR

Manuscript review: MLC/LM/MM/HG/HC

**Competing Interests:** None

**Data Sharing:** None available at present

**Funding:** This project has been funded by the British Hernia Society and the European Hernia Society.

## References

1. van Ramshorst, G.H., et al., *Impact of incisional hernia on health-related quality of life and body image: a prospective cohort study*. Am J Surg, 2012. **204**(2): p. 144-50.
2. Kulacoglu, H. and D. Oztuna, *Growth and trends in publications about abdominal wall hernias and the impact of a specific journal on herniology: a bibliometric analysis*. Hernia, 2011. **15**(6): p. 615-28.
3. Holihan, J.L., et al., *A systematic review of randomized controlled trials and reviews in the management of ventral hernias*. J Surg Res, 2016. **204**(2): p. 311-318.
4. Bhangu, A., et al., *A detailed analysis of outcome reporting from randomised controlled trials and meta-analyses of inguinal hernia repair*. Hernia, 2015. **19**(1): p. 65-75.
5. Parker, S.G., et al., *A systematic methodological review of reported perioperative variables, postoperative outcomes and hernia recurrence from randomised controlled trials of elective ventral hernia repair: clear definitions and standardised datasets are needed*. Hernia, 2018. **22**(2): p. 215-226.
6. Williamson, P. and M. Clarke, *The COMET (Core Outcome Measures in Effectiveness Trials) Initiative: Its Role in Improving Cochrane Reviews*. Cochrane Database Syst Rev, 2012(5): p. ED000041.
7. <http://www.comet-initiative.org>.
8. Bringman, S., et al., *Hernia repair: the search for ideal meshes*. Hernia, 2010. **14**(1): p. 81-7.
9. Muysoms, F.E., et al., *Recommendations for reporting outcome results in abdominal wall repair: results of a Consensus meeting in Palermo, Italy, 28-30 June 2012*. Hernia, 2013. **17**(4): p. 423-33.
10. Braun V, C.V., *Using thematic analysis in psychology. Qualitative Research in Psychology*. 2006.  
. 2006.
11. Bautista-Molano, W., et al., *How well are the ASAS/OMERACT Core Outcome Sets for Ankylosing Spondylitis implemented in randomized clinical trials? A systematic literature review*. Clin Rheumatol, 2014. **33**(9): p. 1313-22.
12. Clarke, M. and P. Williamson, *Core outcome sets and trial registries*. Trials, 2015. **16**: p. 216.
13. Kokotovic, D., I. Gogenur, and F. Helgstrand, *Substantial variation among hernia experts in the decision for treatment of patients with incisional hernia: a descriptive study on agreement*. Hernia, 2017. **21**(2): p. 271-278.
14. Pawlak, M., K. Bury, and M. Smietanski, *The management of abdominal wall hernias - in search of consensus*. Wideochir Inne Tech Maloinwazyjne, 2015. **10**(1): p. 49-56.

1  
2  
3  
4  
5  
6  
7  
8  
9  
10  
11  
12  
13  
14  
15  
16  
17  
18  
19  
20  
21  
22  
23  
24  
25  
26  
27  
28  
29  
30  
31  
32  
33  
34  
35  
36  
37  
38  
39  
40  
41  
42  
43  
44  
45  
46  
47  
48  
49  
50  
51  
52  
53  
54  
55  
56  
57  
58  
59  
60

For peer review only

# BMJ Open

## A Protocol to Develop a Core Outcome Set in Incisional Hernia Surgery – The HarMoNY Project

|                                 |                                                                                                                                                                                                                                                                                                                                                                                                                                                                                                                                                                                                                                                                                                                                                                                                                                                                                                                                                                                                  |
|---------------------------------|--------------------------------------------------------------------------------------------------------------------------------------------------------------------------------------------------------------------------------------------------------------------------------------------------------------------------------------------------------------------------------------------------------------------------------------------------------------------------------------------------------------------------------------------------------------------------------------------------------------------------------------------------------------------------------------------------------------------------------------------------------------------------------------------------------------------------------------------------------------------------------------------------------------------------------------------------------------------------------------------------|
| Journal:                        | <i>BMJ Open</i>                                                                                                                                                                                                                                                                                                                                                                                                                                                                                                                                                                                                                                                                                                                                                                                                                                                                                                                                                                                  |
| Manuscript ID                   | bmjopen-2021-059463.R1                                                                                                                                                                                                                                                                                                                                                                                                                                                                                                                                                                                                                                                                                                                                                                                                                                                                                                                                                                           |
| Article Type:                   | Protocol                                                                                                                                                                                                                                                                                                                                                                                                                                                                                                                                                                                                                                                                                                                                                                                                                                                                                                                                                                                         |
| Date Submitted by the Author:   | 07-Feb-2022                                                                                                                                                                                                                                                                                                                                                                                                                                                                                                                                                                                                                                                                                                                                                                                                                                                                                                                                                                                      |
| Complete List of Authors:       | Harji, Deena; Manchester University NHS Foundation Trust<br>Thomas, Christophe ; Northern Surgical Trainees Research Association ,<br>Antoniou, Stavros; Mediterranean Hospital of Cyprus,<br>Chandraratan , Harsha ; Notra Dame University , General Surgery;<br>Obesity Surgery WA, 162 Cambridge St<br>Griffiths , Ben; Manchester University NHS Foundation Trust<br>Heniford, Todd; Carolinas Medical Center<br>Horgan , Liam ; Northumbria Healthcare NHS Foundation Trust<br>Koeckerling, Ferdinand; Vivantes<br>Lopez-Cano, Manuel; Univ Autonoma Barcelona<br>Massey , Lisa ; Royal Devon & Exeter NHS Foundation Trust, Colorectal<br>Surgery<br>Miserez, Marc ; University Hospital Gasthuisberg<br>Montgomery, Agneta; Skanes universitetssjukhus Malmo, surgery<br>Muysoms , Filip ; Maria Middelaes<br>Poulose, Benjamin; The Ohio State University Wexner Medical Center<br>Reinpold , Wolfgang ; Gross Sand Hospital<br>Smart , Neil ; Royal Devon & Exeter NHS Foundation Trust |
| <b>Primary Subject Heading</b>: | Surgery                                                                                                                                                                                                                                                                                                                                                                                                                                                                                                                                                                                                                                                                                                                                                                                                                                                                                                                                                                                          |
| Secondary Subject Heading:      | Research methods, Surgery                                                                                                                                                                                                                                                                                                                                                                                                                                                                                                                                                                                                                                                                                                                                                                                                                                                                                                                                                                        |
| Keywords:                       | QUALITATIVE RESEARCH, SURGERY, STATISTICS & RESEARCH METHODS                                                                                                                                                                                                                                                                                                                                                                                                                                                                                                                                                                                                                                                                                                                                                                                                                                                                                                                                     |
|                                 |                                                                                                                                                                                                                                                                                                                                                                                                                                                                                                                                                                                                                                                                                                                                                                                                                                                                                                                                                                                                  |

SCHOLARONE™  
Manuscripts

1  
2  
3 A Protocol to Develop a Core Outcome Set in Incisional Hernia Surgery – The  
4  
5 HarMoNY Project  
6  
7  
8  
9

10 ***NoSTRA HarMoNY***

11 (Northern Surgical Trainees Research Association Hernia & Abdominal Reconstruction - Measuring  
12 Outcomes, Nociception & quality of life) collaborative research group.  
13  
14  
15

16 All authors including the corresponding author will come under the collaborative authorship of NoSTRA  
17 HarMoNY.  
18  
19

20  
21  
22 **Corresponding Author**  
23

24 Miss Deena Harji

25  
26 Department of Colorectal Surgery, Manchester University NHS Foundation Trust, Wythenshawe  
27 Hospital, Southmoor Rd, Wythenshawe, Manchester M23 9LT  
28

29 [Deena\\_harji@hotmail.com](mailto:Deena_harji@hotmail.com)  
30  
31

32  
33 Christophe Thomas

34 Northern Surgical Trainees Research Association (NoSTRA)

35  
36 Northern Deanery, Waterfront 4, Goldcrest Way, Newburn Riverside, Newcastle Upon Tyne, NE15  
37  
38 8NY  
39

40 [c.l.g.thomas@gmail.com](mailto:c.l.g.thomas@gmail.com)  
41  
42

43  
44  
45 Stavros A. Antoniou

46 Department of Surgery, Royal Devon & Exeter NHS Foundation Trust, Exeter, UK

47 [stavros.antoniou@hotmail.com](mailto:stavros.antoniou@hotmail.com)  
48  
49

50  
51  
52 Harsha Chandraratan

53 Notra Dame University , General Surgery, 27/100 Murdoch Drive, Murdoch , Murdoch, WA, Australia

54  
55 [drchandra747@gmail.com](mailto:drchandra747@gmail.com)  
56  
57  
58  
59  
60

1  
2  
3 Ben Griffiths

4  
5 Department of Colorectal Surgery, Manchester University NHS Foundation Trust, Manchester Royal  
6  
7 Infirmary, Oxford Road, Manchester, M13 9WL

8  
9 [Bengriffiths73@icloud.com](mailto:Bengriffiths73@icloud.com)  
10  
11  
12  
13

14  
15 Todd Henniford

16 Division of Gastrointestinal and Minimally Invasive Surgery Carolinas Medical Center, Charlotte, NC

17  
18 [todd.heniford@gmail.com](mailto:todd.heniford@gmail.com)  
19  
20  
21

22  
23 Liam Horgan

24 Upper Gastrointestinal Surgical Department, Northumbria Healthcare NHSFT, North Shields, Tyne  
25  
26 and Wear, UK

27  
28 [liam@horgans.info](mailto:liam@horgans.info)  
29  
30  
31

32  
33 Ferdinand Koeckerling

34 Department of Surgery and Center for Minimally Invasive Surgery, Academic Teaching Hospital of  
35  
36 Charité Medical School, Vivantes Hospital, Neue Bergstraße 6, D-13585 Berlin, Germany

37  
38 [ferdinand.koeckerling@vivantes.de](mailto:ferdinand.koeckerling@vivantes.de)  
39  
40  
41

42  
43 Manuel López-Cano

44 Abdominal Wall Surgery Unit, Hospital Universitario Vall d'Hebron, Universidad Autónoma de  
45  
46 Barcelona, Barcelona, Spain

47  
48 [mlpezcano@gmail.com](mailto:mlpezcano@gmail.com)  
49  
50  
51

52  
53 Lisa Massey

54 Department of Surgery, Royal Devon & Exeter NHS Foundation Trust, Exeter, UK

55  
56 [lisahmassey@gmail.com](mailto:lisahmassey@gmail.com)  
57  
58

59  
60 Marc Miserez

1  
2  
3 Dept of Abdominal Surgery, University Hospital Gasthuisberg, KU Leuven, 3000 Leuven, Belgium

4  
5 [marc.miserez@uzleuven.be](mailto:marc.miserez@uzleuven.be)  
6  
7

8  
9 Agneta Montgomery

10  
11 Department of Clinical Sciences Malmö, Lund University, Malmö Sweden

12  
13 [Agneta.Montgomery@skane.se](mailto:Agneta.Montgomery@skane.se)  
14  
15

16  
17 Filip Muysoms

18  
19 Department of Surgery, Maria Middelaes, Ghent, Belgium

20  
21 [filip.muysoms@gmail.com](mailto:filip.muysoms@gmail.com)  
22  
23

24  
25 Benjamin K. Poulouse

26  
27 Division of General and Gastrointestinal Surgery, The Ohio State University Wexner Medical Center,

28  
29 N729 Doan Hall, 410 West 10<sup>th</sup> Avenue, Columbus, OH 43210

30  
31 [benjamin.poulouse@osumc.edu](mailto:benjamin.poulouse@osumc.edu)  
32  
33

34  
35 Wolfgang Reinpold

36  
37 Dept. of Surgery and Reference Hernia Center, Gross Sand Hospital Hamburg, Gross Sand 3, D-21107

38  
39 Hamburg, Germany

40  
41 [wreinpold@gmx.net](mailto:wreinpold@gmx.net)  
42  
43

44  
45 Neil Smart

46  
47 Department of Surgery, Royal Devon & Exeter NHS Foundation Trust, Exeter, UK

48  
49 [drneilsmart@hotmail.com](mailto:drneilsmart@hotmail.com)  
50

51  
52 Word Count: 2609

53  
54 Author Contribution

55  
56  
57 Deena Harji - Idea generation, data collection and analysis, write up

58  
59 Stavros A. Antoniou - Idea generation, Review of manuscript  
60

1  
2  
3 Harsha Chandraratan - Review of manuscript  
4  
5 Ben Griffiths - Idea generation, data collection and analysis, manuscript review  
6  
7 Todd Henniford - Review of manuscript  
8  
9 Liam Horgan - Review of manuscript  
10  
11 Ferdinand Köckerling - Review of manuscript  
12  
13 Manuel López-Cano - Review of manuscript  
14  
15 Lisa Massey - Review of manuscript  
16  
17 Marc Miserez - Review of manuscript  
18  
19 Agneta Montgomery - Idea generation, Review of manuscript  
20  
21 Filip Muysoms - Review of manuscript  
22  
23 Benjamin K. Poulouse - Review of manuscript  
24  
25 Wolfgang Reinpold - Review of manuscript  
26  
27 Neil Smart - Idea generation, data analysis, manuscript review  
28  
29 Christophe Thomas - Idea generation, data collection and analysis, write up  
30

## 31 Abstract

## 32 Introduction

33  
34  
35  
36 Incisional hernia has an incidence of up to 20% following laparotomy and is associated with significant  
37 morbidity and impairment of quality of life. A variety of surgical strategies including techniques and  
38 mesh types are available to manage patients with incisional hernia. Previous works have reported  
39 significant heterogeneity in outcome reporting for abdominal wall herniae, including ventral and inguinal  
40 hernia. This is coupled with under-reporting of important clinical and patient-reported outcomes. The  
41 lack of standardisation in outcome reporting contributes to reporting bias, hinders evidence synthesis and  
42 adequate data comparison between studies. This project aims to develop a core outcome set (COS) of  
43 clinically important, patient-oriented outcomes to be used to guide reporting of future research in  
44 incisional hernia.  
45  
46  
47  
48  
49  
50  
51  
52  
53

## 54 Methods

55  
56  
57  
58 This project has been designed as an international, multi-centre, mixed-methods project. Phase I will be  
59 a systematic review of current literature to examine the current clinical and patient-reported outcomes  
60



1  
2  
3 for incisional hernia and abdominal wall reconstruction. Phase II will identify the outcomes of  
4 importance to all key stakeholders through in depth qualitative interviews. Phase III will achieve  
5 consensus on outcomes of most importance and for inclusion into a COS through a Delphi process. Phase  
6  
7  
8  
9 IV will achieve consensus on the outcomes that should be included in a final COS.  
10

## 11 12 13 Ethics and Dissemination

14  
15 The adoption of this COS into clinical and academic practice will be endorsed by the American, British  
16 and European Hernia Societies. Its utilisation in future clinical research will enable appropriate data  
17 synthesis and comparison and will enable better clinical interpretation and application of the current  
18 evidence base. This study has been registered with the Core Outcome Measures in Effectiveness Trials  
19 (COMET) initiative.  
20  
21  
22  
23  
24  
25

26 Trial Registration: PROSPERO registration CRD42018090084.  
27  
28  
29

## 30 Strengths and Limitations

- 31  
32 • This project will ensure the development of an international, clinically relevant, patient-oriented  
33 core outcome set to be used to guide outcome reporting in future clinical research.
- 34  
35 • A robust systematic review will identify current outcomes in randomised and non-randomised  
36 studies reporting outcomes in incisional hernia.
- 37  
38 • In-depth qualitative interviews with key stakeholders including patients, nurses, radiologists,  
39 physiotherapists, members of international hernia societies and industry partners will identify  
40 outcomes of importance to all these groups.
- 41  
42 • This project will determine which outcomes to measure, however, further work will be  
43 necessary to agree and recommend a definition or measurement instrument for each of the  
44 outcomes in the COS.  
45  
46  
47  
48  
49  
50  
51

## 52 53 Background

54  
55 Incisional hernia following laparotomy has an incidence of up to 20% and is associated with significant  
56 morbidity and impairment of quality of life [1]. The management of incisional hernia has evolved over  
57 recent years, with a variety of techniques, meshes and operative strategies available to manage this  
58  
59  
60

1  
2  
3 challenging cohort of patients. Given the range of options available there is significant complexity  
4 involved in the management of patients with incisional hernia. Alongside this there is considerable  
5 variation in management and outcome reporting. Despite an exponential increase in the number of peer-  
6 reviewed publications on the management of incisional hernia over the last decade [2], the  
7 methodological quality of the majority of these studies is poor, with the majority of studies reporting  
8 outcomes on incisional hernia being of Level 4 quality according to the Oxford Centre for Evidence  
9 Based Medicine [3]. A recent systematic review reported over 75% of randomised controlled trials and  
10 meta-analyses reporting outcomes on ventral hernias were methodologically flawed, with variable  
11 adherence to standardised reporting frameworks such as Consolidated Standards of Reporting  
12 Trials (CONSORT) checklist or Preferred Reporting Items for Systematic Reviews and Meta-Analyses  
13 (PRISMA) Checklist PRISMA [3].

14  
15  
16  
17  
18  
19  
20  
21  
22  
23  
24  
25  
26 There is little known about standardised outcome reporting in patients with incisional hernia. Previous  
27 work examining outcome reporting for inguinal hernia identified significant variation in outcomes  
28 employed to report clinical outcomes in this group. Significant heterogeneity in outcome definitions and  
29 assessment instruments exist in inguinal hernia outcome reporting, alongside under-reporting of a  
30 number of important clinical and patient-reported outcomes [4]. More recently, work examining outcome  
31 reporting in randomised controlled trials of ventral hernia revealed marked heterogeneity in outcome  
32 reporting of clinical endpoints related to hernia recurrence [5]. Subsequently, it may be hypothesised that  
33 similar variation and under-reporting of relevant outcomes exists within the current literature for  
34 incisional hernia repair.

35  
36  
37  
38  
39  
40  
41  
42  
43  
44  
45 Core outcome sets (COS) have been developed to overcome heterogeneity in outcome reporting, reduce  
46 reporting bias and enable adequate evidence synthesis, comparison of data between studies and  
47 meaningful clinical interpretation and application of current evidence [6]. COS are an agreed set of  
48 outcomes, which should be measured and reported, as a minimum in all studies and trials for a specific  
49 clinical area. This work was initiated and developed by the COMET (Core Outcome Measures in  
50 Effectiveness Trials) initiative, which aims to facilitate and guide the development of a number of COS  
51 [7]. Currently, there is no COS for incisional hernia. However, there are guidelines available to guide  
52 reporting outcomes with regards to mesh properties [8] and clinical outcomes [9] associated with  
53  
54  
55  
56  
57  
58  
59  
60

1  
2  
3 abdominal wall repair. Although, these guidelines are useful in trying to standardise reporting outcomes,  
4 they do not reflect the opinion of all stakeholders, in particular patients, when considering which  
5 outcomes are of the most importance when reporting outcomes related to incisional hernia repair. To  
6 improve the quality of the current evidence base and to improve outcome reporting a COS in incisional  
7 hernia is highly desirable.  
8  
9  
10  
11  
12  
13

## 14 Aims

15  
16 The aim of this project is to develop a COS of clinically important, patient-oriented outcomes to be used  
17 to guide reporting of future research in incisional hernia.  
18  
19  
20  
21  
22

## 23 Methods

24  
25 An international, mixed-methods study will be conducted in accordance with Core Outcome Measures  
26 in Effectiveness Trials (COMET) guidelines to develop a COS for use in incisional hernia. Phase I will  
27 examine the current clinical and patient-reported outcomes for incisional hernia and abdominal wall  
28 reconstruction within the literature. Phase II will identify the outcomes of importance to all key  
29 stakeholders through in depth qualitative interviews. Phase III will achieve consensus on outcomes of  
30 most importance and for inclusion into a COS through a Delphi process. Phase IV will achieve consensus  
31 on the outcomes that should be included in a final COS.  
32  
33  
34  
35  
36  
37  
38  
39

### 40 Phase I: Systematic review of clinical and patient-reported outcomes

41  
42 A number of detailed systematic reviews of currently reported clinical and patient reported outcomes in  
43 incisional hernia and complex abdominal wall reconstruction will be conducted. The full protocol  
44 including eligibility criteria and search strategy is available online via the PROSPERO database  
45 (CRD42018090084).  
46  
47  
48  
49  
50  
51  
52  
53

### 54 Phase II: Stakeholder Qualitative Interviews

55  
56 To ensure all key stakeholders are appropriately represented and all outcomes are captured within the  
57 COS we will conduct in-depth qualitative interviews with patients and other stakeholders that are not  
58 adequately represented within the current literature i.e. nurses, radiologists, physiotherapists. We will  
59  
60

1  
2  
3 also interview key members of the international hernia societies including the American Hernia Society,  
4 British Hernia Society and the European Hernia Society and industry partners in a bid to gauge a wider  
5 perspective.  
6  
7  
8  
9

## 10 Recruitment

### 11 Healthcare professionals

12  
13 All members of the American Hernia Society, the British Hernia Society and the European Hernia  
14 Society will be contacted and invited to participate.  
15  
16  
17  
18  
19

### 20 Industry Partners

21  
22 Industry partners will be identified through key hernia organisations including the American Hernia  
23 Society, the British Hernia Society and the European Hernia Society. Industry stakeholders will be  
24 contacted and invited to participate.  
25  
26  
27  
28  
29

### 30 Patients

31  
32 Members of the American Hernia Society, British Hernia Society and the European Hernia Society will  
33 be asked to identify potential patient participants from clinic lists, theatre lists and patient records.  
34 Recruitment letters will be sent to the identified patients, either in person during routine follow up visits  
35 or by post. The recruitment letter will give a full explanation of the qualitative interviews, instructions  
36 to participate and the contact details of the research team.  
37  
38  
39  
40  
41  
42  
43

### 44 Methodology

45  
46 In-depth face-to-face or telephone cognitive interviews will be undertaken with eligible patients and  
47 stakeholders. Interviews will explore patients' perceptions and experiences regarding living with an  
48 incisional hernia and will identify the thoughts and opinions of stakeholders who are not adequately  
49 represented within the current literature. A standardised, semi-structured interview guide will inform the  
50 cognitive interviews. All interviews will be recorded. Open-ended questions will be used at the start of  
51 the cognitive interview followed by close-ended questions to further explore any relevant themes. To  
52 ensure appropriate representation of all stakeholders, we will conduct interviews with patients and other  
53  
54  
55  
56  
57  
58  
59  
60

key stakeholders from all participating countries. We will aim to conduct between 5-10 interviews per country.

#### Patient Eligibility Criteria

##### Inclusion criteria:

- Aged >18 years old.
- With an existing incisional hernia **or**
- A surgically treated incisional hernia in the last 12 months **and**
- Able to provide written informed consent

##### Exclusion criteria:

- An existing other ventral hernia i.e. epigastric, umbilical, paraumbilical, inguinal, port-site hernia **or**
- A surgically treated ventral hernia i.e. epigastric, umbilical, paraumbilical, inguinal, port-site hernia **or**

To ensure our COS is representative of all stakeholders, with particular reference to patients with incisional hernia a purposive sampling strategy has been designed to aid recruitment (Table 1). Our sampling strategy will target a number of key factors to reflect the range and diversity of the target population. There is no minimal sample size for cognitive interviews.

Table 1: Purposive Sampling Strategy

| Patient Factors | Number of Patients |
|-----------------|--------------------|
| <b>Age</b>      |                    |
| 18-30           | 4                  |
| 31 – 60         | 4                  |
| >60             | 4                  |

|                                    |                        |
|------------------------------------|------------------------|
| <b>Gender</b>                      |                        |
| Male                               | 8-10                   |
| Female                             | 8-10                   |
| <b>Presentation</b>                |                        |
| Elective                           | 6-8                    |
| Emergency                          | 6-8                    |
| <b>Repair</b>                      |                        |
| Primary                            | 6-8                    |
| Mesh                               | 6-8                    |
| <b>No of repairs</b>               |                        |
| 1 <sup>st</sup> repair             | 4                      |
| Recurrent incisional hernia repair | 4                      |
| <b>Hernia size</b>                 |                        |
| <10cm in width                     | 8 – 10                 |
| >10cm in width                     | 8 – 10                 |
| <b>Use of adjuncts</b>             |                        |
| Yes                                | 4                      |
| No                                 | 4                      |
| <b>Stakeholder Factors</b>         | Number of Participants |
| <b>Speciality</b>                  |                        |
| General Surgery                    | 4-6                    |
| Plastic Surgery                    | 4-6                    |
| Radiology                          | 4-6                    |
| Specialist nurses/physiotherapists | 4-6                    |
| Industry partner                   | 4-6                    |
| <b>Country</b>                     |                        |
| UK                                 | 4                      |
| Europe                             | 4                      |
| USA                                | 4                      |
| Australia                          | 4                      |

|  |  |
|--|--|
|  |  |
|--|--|

## Data Analysis

All interviews will be audio recorded and transcribed verbatim and transcripts will be imported into NVivo. All transcripts will be anonymised. Interviews will be coded using the principles of thematic content analysis [10]. Relevant outcomes will be identified and appropriately coded from the transcripts using a provisional coding framework based on the outcomes extracted from the systematic review. Coded outcomes that are sufficiently similar will be grouped into similar categories and then themes. Analysis will be an iterative process, with data being analysed after rounds of three consecutive interviews. Data analysis will be continued up until the point of data saturation. This is the point on the data analysis process where no further information is elicited.

## Phase III: Delphi Study

### Consolidation of Outcomes

The outcomes identified in Phase I and II will be combined, developed into a long-list of items and categorised into broad domains using the principles of thematic content analysis. Appropriate questions will be mapped to these domains and will form the basis of the Delphi study. Questions will have a lay translation available. We will pilot the Delphi study with our steering committee to ensure it is accessible, comprehensible and content valid.

### Forward-Backward Translation

Given the international nature of this study, we will translate the Delphi study using forward-backward translation to ensure accessibility of the study by all international participants. The aim of translation is to achieve different language versions of the original Delphi questionnaire. The linguistic and translation process should ensure that the translated version of the Delphi are conceptual, semantic and pragmatic equivalents of the original questionnaire, whilst ensuring it is culturally appropriate, relevant and meaningful to the target countries. The original Delphi questionnaire (English) will be used as the standard from which all other translations are made.

1  
2  
3  
4  
5 Forward translation will be undertaken by two healthcare professionals with an understanding of  
6 incisional hernia. The translators will be bilingual with their primary language being that of the target  
7 country. They will perform a detailed review of the Delphi questionnaire and translate the questionnaire  
8 appropriately. Two independent translations will be prepared; these will be reviewed and compared to  
9 achieve a consensus version. Any discrepancies between the translated version and the original Delphi  
10 questionnaire will be discussed with the steering committee.  
11  
12  
13  
14  
15  
16

17  
18 The final translated version will be translated back into English (backward translation). This will be done  
19 by a native English speaker who is also proficient in the target language. The original Delphi  
20 questionnaire will be compared to the backward translation version and reviewed to ensure consistency.  
21  
22 The aim is to ensure linguistic and conceptual equivalence between the original and translated versions  
23 of the Delphi. Any discrepancies will be discussed and resolved with the steering committee and the  
24 bilingual translators who undertook the forward translation. If equivalent versions have not been created  
25 further translational work may be required. This may include additional forward translations and/or the  
26 addition of further items/questions and will be repeated as many times as necessary to achieve a  
27 satisfactory translated version.  
28  
29  
30  
31  
32  
33  
34  
35  
36  
37

## 38 Recruitment

39  
40  
41 Method of recruitment will be the same as Phase II. Healthcare professionals, patients and industry  
42 stakeholders will be invited to participate through online web and social media platforms of the  
43 participating hernia societies (American, British and European) and through the Northern Surgical  
44 Trainees Research Association. Snowball sampling will be allowed to increase the sample size and reach  
45 of the study.  
46  
47  
48  
49  
50  
51

## 52 Sample Size

53  
54 There are no pre-requisite criteria for sample size for participation in Delphi studies. We hope by  
55 engagement with the American, British and European hernia societies we will capture the majority of  
56 individuals interested in incisional hernia.  
57  
58  
59  
60



## Consent

No explicit consent will be obtained for participation in the Delphi study. Consent will be implied through the process of participation. The registration page of the website hosting the Delphi study will outline that registration to participate in the Delphi process through submission of name and email address will indicate agreement to participate.

## Delphi Process

The aim of the Delphi study is to achieve consensus amongst all key stakeholders including patients, surgeons, radiologists and specialist nurses on the importance of different outcomes in sequential questionnaires. The Delphi questionnaires will be developed using the DelphiManager software developed by the COMET initiative. Relevant demographics will be collected for each stakeholder group.

Two sequential rounds of Delphi voting will be held with a feedback round in between. The first Delphi round will enable participants to suggest outcomes that may not have been included or overlooked. The spread of scores for each question item should be reduced in between rounds as consensus is reached. Following the first Delphi round participants will be provided with feedback. Participants will have access to their individual scores from the first round and scores from key stakeholder group.

All included outcomes will be scored on a 9 point Likert scale, with 1 being 'not essential' to 9 being 'absolutely essential' for inclusion into a COS. The 9 point Likert scale will be grouped into three categories; 1-3 (limited importance), 4-6 (important but not critical), 7-9 (of critical importance).

Consensus will be defined as the following:

For inclusion: more than 75% of respondents within a stakeholder group rate the outcome as critically important and less than 15% of respondents rate the outcome as of limited importance.

For exclusion: more than 75% of respondents within a stakeholder group rate the outcome as of limited importance and less than 15% of respondents rate the outcome as of critical importance.

No consensus

## Phase IV: Consensus Meeting

A consensus meeting of all key stakeholders will be held in conjunction with a European Hernia Society meeting to discuss the results from the Delphi study. All participants registering to complete the Delphi study will be invited to participate in the consensus meeting. The aim of this consensus meeting is to agree on the final COS for incisional hernia. All outcomes will be discussed; a proposal will be made to include all outcomes in the final COS that have been categorised as 'for inclusion' by all stakeholders and to exclude all outcomes that have been categorised as 'for exclusion' by all stakeholders. Participants will vote electronically to accept or reject these proposals. All other outcomes categories as 'for inclusion', 'for exclusion' or 'no consensus' by one or two stakeholders will be discussed and further rounds of voting will be used to agree the final COS. If no consensus is achieved a further consensus meeting will be held.

## Patient and Public Involvement

The HarMoNY project has been discussed with patients at national hernia meetings and has been well received. A dedicated, international patient and public (PPI) steering group will be appointed to inform the processes of Phases II-IV of this project. Patients will be approached by key members of the project team to participate in this steering group. This PPI steering group will help inform recruitment processes, help design and evaluate all patient information sheets to ensure all information is applicable and understandable and advise on the content and format of dissemination of the final COS.

## Ethics

Ethical approval has been obtained from the Health Research Authority and Health and Care Research Wales (REC 21/WA/0278). Appropriate ethical approval will be sought from all participating countries in accordance with local and national guidelines. This study will be conducted in keeping with the Declaration of Helsinki.

## Discussion

1  
2  
3 Defining important outcomes and standardising their reporting has been recognised to be of key  
4 importance in clinical research, which has subsequently led to the development of a number of COS.  
5  
6  
7 There has been a steady rise in the adoption and utilisation of COS [11], with a number of key  
8 stakeholders, including commissioners and funding bodies recognising the importance and benefits of  
9 COS for improving reporting outcomes [12]. Incisional hernia repair can be complex with significant  
10 variation in clinical management due to the great diversity of available surgical techniques [13, 14]. To  
11 ensure clinical heterogeneity is not reflected in outcome reporting the development of COS in this cohort  
12 of patients is essential. Ensuring consistent outcome reporting will reduce reporting bias, improve data  
13 synthesis and comparison, and will enable better clinical interpretation and application of the current  
14 evidence base. It is hoped through the development of a COS for incisional hernia, internationally agreed  
15 by patients, clinicians and key stakeholders, including the American, British and European Hernia  
16 Society, a minimum number of key outcomes will be reported in future clinical studies. This will help  
17 strengthen the current evidence base informing incisional hernia repair through standardised reporting.  
18  
19  
20  
21  
22  
23  
24  
25  
26  
27  
28  
29

30 **Contributorship:**

31 Study design: DH/CT/NS/BG/LH

32 Protocol writing: DH/CT/NS/BG

33 Methodological input: AM/FM/MM/TH/BP/AA/FK/WR

34 Manuscript review: MLC/LM/MM/HG/HC  
35  
36  
37  
38  
39  
40

41 **Competing Interests:** None

42 **Data Sharing:** None available at present

43 **Funding:** This project has been funded by the British Hernia Society and the European Hernia Society.  
44  
45  
46  
47  
48  
49  
50  
51  
52  
53  
54  
55  
56  
57  
58  
59  
60

## References

1. van Ramshorst, G.H., et al., *Impact of incisional hernia on health-related quality of life and body image: a prospective cohort study*. Am J Surg, 2012. **204**(2): p. 144-50.
2. Kulacoglu, H. and D. Oztuna, *Growth and trends in publications about abdominal wall hernias and the impact of a specific journal on herniology: a bibliometric analysis*. Hernia, 2011. **15**(6): p. 615-28.
3. Holihan, J.L., et al., *A systematic review of randomized controlled trials and reviews in the management of ventral hernias*. J Surg Res, 2016. **204**(2): p. 311-318.
4. Bhangu, A., et al., *A detailed analysis of outcome reporting from randomised controlled trials and meta-analyses of inguinal hernia repair*. Hernia, 2015. **19**(1): p. 65-75.
5. Parker, S.G., et al., *A systematic methodological review of reported perioperative variables, postoperative outcomes and hernia recurrence from randomised controlled trials of elective ventral hernia repair: clear definitions and standardised datasets are needed*. Hernia, 2018. **22**(2): p. 215-226.
6. Williamson, P. and M. Clarke, *The COMET (Core Outcome Measures in Effectiveness Trials) Initiative: Its Role in Improving Cochrane Reviews*. Cochrane Database Syst Rev, 2012(5): p. ED000041.
7. <http://www.comet-initiative.org>.
8. Bringman, S., et al., *Hernia repair: the search for ideal meshes*. Hernia, 2010. **14**(1): p. 81-7.
9. Muysoms, F.E., et al., *Recommendations for reporting outcome results in abdominal wall repair: results of a Consensus meeting in Palermo, Italy, 28-30 June 2012*. Hernia, 2013. **17**(4): p. 423-33.
10. Braun V, C.V., *Using thematic analysis in psychology. Qualitative Research in Psychology*. 2006.  
. 2006.
11. Bautista-Molano, W., et al., *How well are the ASAS/OMERACT Core Outcome Sets for Ankylosing Spondylitis implemented in randomized clinical trials? A systematic literature review*. Clin Rheumatol, 2014. **33**(9): p. 1313-22.
12. Clarke, M. and P. Williamson, *Core outcome sets and trial registries*. Trials, 2015. **16**: p. 216.
13. Kokotovic, D., I. Gogenur, and F. Helgstrand, *Substantial variation among hernia experts in the decision for treatment of patients with incisional hernia: a descriptive study on agreement*. Hernia, 2017. **21**(2): p. 271-278.
14. Pawlak, M., K. Bury, and M. Smietanski, *The management of abdominal wall hernias - in search of consensus*. Wideochir Inne Tech Maloinwazyjne, 2015. **10**(1): p. 49-56.

1  
2  
3  
4  
5  
6  
7  
8  
9  
10  
11  
12  
13  
14  
15  
16  
17  
18  
19  
20  
21  
22  
23  
24  
25  
26  
27  
28  
29  
30  
31  
32  
33  
34  
35  
36  
37  
38  
39  
40  
41  
42  
43  
44  
45  
46  
47  
48  
49  
50  
51  
52  
53  
54  
55  
56  
57  
58  
59  
60

For peer review only
